# Supplementary material for: Combined Respiratory Chain Deficiency and UQCC2 Mutations in Neonatal Encephalomyopathy: Defective Supercomplex Assembly in Complex III Deficiencies
Source: Hindawi journal article supplement (doi:10.1155/2017/7202589), 2017-01-01
Supplement: f1 [file 7202589.f1.pdf]

Supplementary table 1: Prediction of pathogenicity

| <b>Mutation</b>               | <b>c.23G&gt;C</b> | <b>c.28C&gt;T</b> |
|-------------------------------|-------------------|-------------------|
| Chromosomal location          | chr6:33679441C>G  | chr6:33679436G>A  |
| Protein change                | p.Arg8Pro         | p.Leu10Phe        |
| Polyphen-2 score (max. 1)     | 0.991             | 0.934             |
| Polyphen-2 prediction         | Probably damaging | Possibly damaging |
| SIFT score (cutoff<0.050)     | 0.034             | 0.009             |
| SIFT prediction               | Damaging          | Damaging          |
| Provean score (cutoff<-2.5)   | -4.33             | -2.88             |
| Provean prediction            | Deleterious       | Deleterious       |
| MutationTaster score (max. 1) | 0.999997704040623 | 0.996059894177104 |
| MutationTaster prediction     | Disease causing   | Disease causing   |
| CADD score                    | 25.2              | 27.3              |
